# Supplementary material
Source: publisher figshare collection journal article supplement (https://acs.figshare.com/ndownloader/files/3821179)

**Supporting Information:**

Excited State Dynamics of the Isolated Green  
Fluorescent Protein Chromophore Anion  
Following UV Excitation

*Christopher W. West, James N. Bull, Alex S. Hudson, Steven L. Cobb and Jan R. R. Verlet\**

Department of Chemistry, Durham University, Durham, DH1 3LE

## Relative contribution of $S_3$ autodetachment to internal conversion

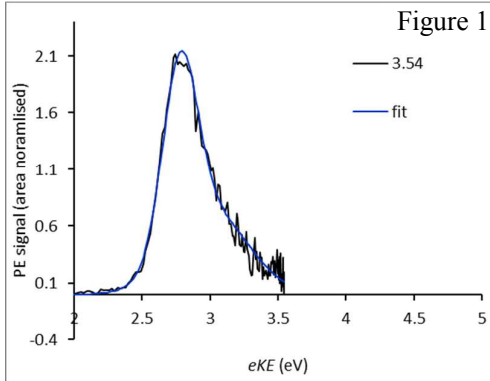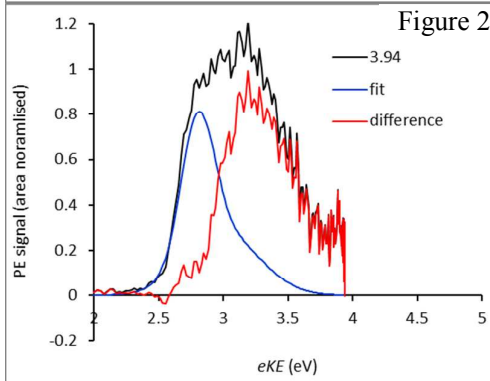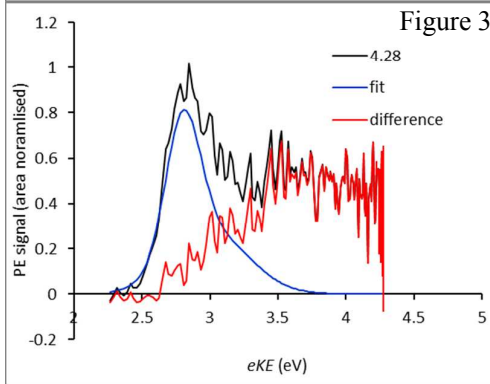

To determine the relative contribution of the  $S_3 \rightarrow D_0$  autodetachment channel compared to all other channels (*i.e.*  $S_3 \rightarrow S_2$  internal conversion), we have fitted the PE spectrum at  $h\nu = 3.54$  eV to a function (see Figure 1, blue line).

This fit is then used to extract the contribution of the  $S_3 \rightarrow D_0$  autodetachment channel. For example, we fit the rising edge of the  $h\nu = 3.94$  eV spectrum to this and retain the difference (see Figure 2, red). We follow the same procedure for other photon energies, and  $h\nu = 4.28$  eV is shown as an example (see Figure 3).

Note that the PE spectra are normalized to the total PE signal in each spectrum. To attain the best fits, we require the  $S_3 \rightarrow D_0$  autodetachment channel to be the same across the range, as shown. The ratio  $S_3 \rightarrow D_0 : S_3 \rightarrow S_2$  is found to be

0.7:1 and 0.6:1 for  $h\nu = 3.94$  and 4.28 eV, respectively. Hence, the channel leading to  $S_3 \rightarrow S_2$  internal conversion has a slightly higher yield than the  $S_3 \rightarrow D_0$  autodetachment and therefore a slightly shorter lifetime. The observed lifetime is  $(\tau_{\text{obs}})^{-1} = (\tau_{\text{IC}})^{-1} + (\tau_{\text{AD}})^{-1} < 40$  fs, where  $\tau_{\text{IC}}$  and  $\tau_{\text{AD}}$  are the internal conversion and autodetachment lifetimes. The lifetimes are related to the relative yields by  $\tau_{\text{IC}}/\tau_{\text{AD}} = 0.7$  or 0.6 for  $h\nu = 3.94$  and 4.28 eV, respectively. Thus,  $\tau_{\text{IC}} < 65$  fs and  $\tau_{\text{AD}} < 100$  fs.

## Individual Photoelectron Spectra included in Figure 1e

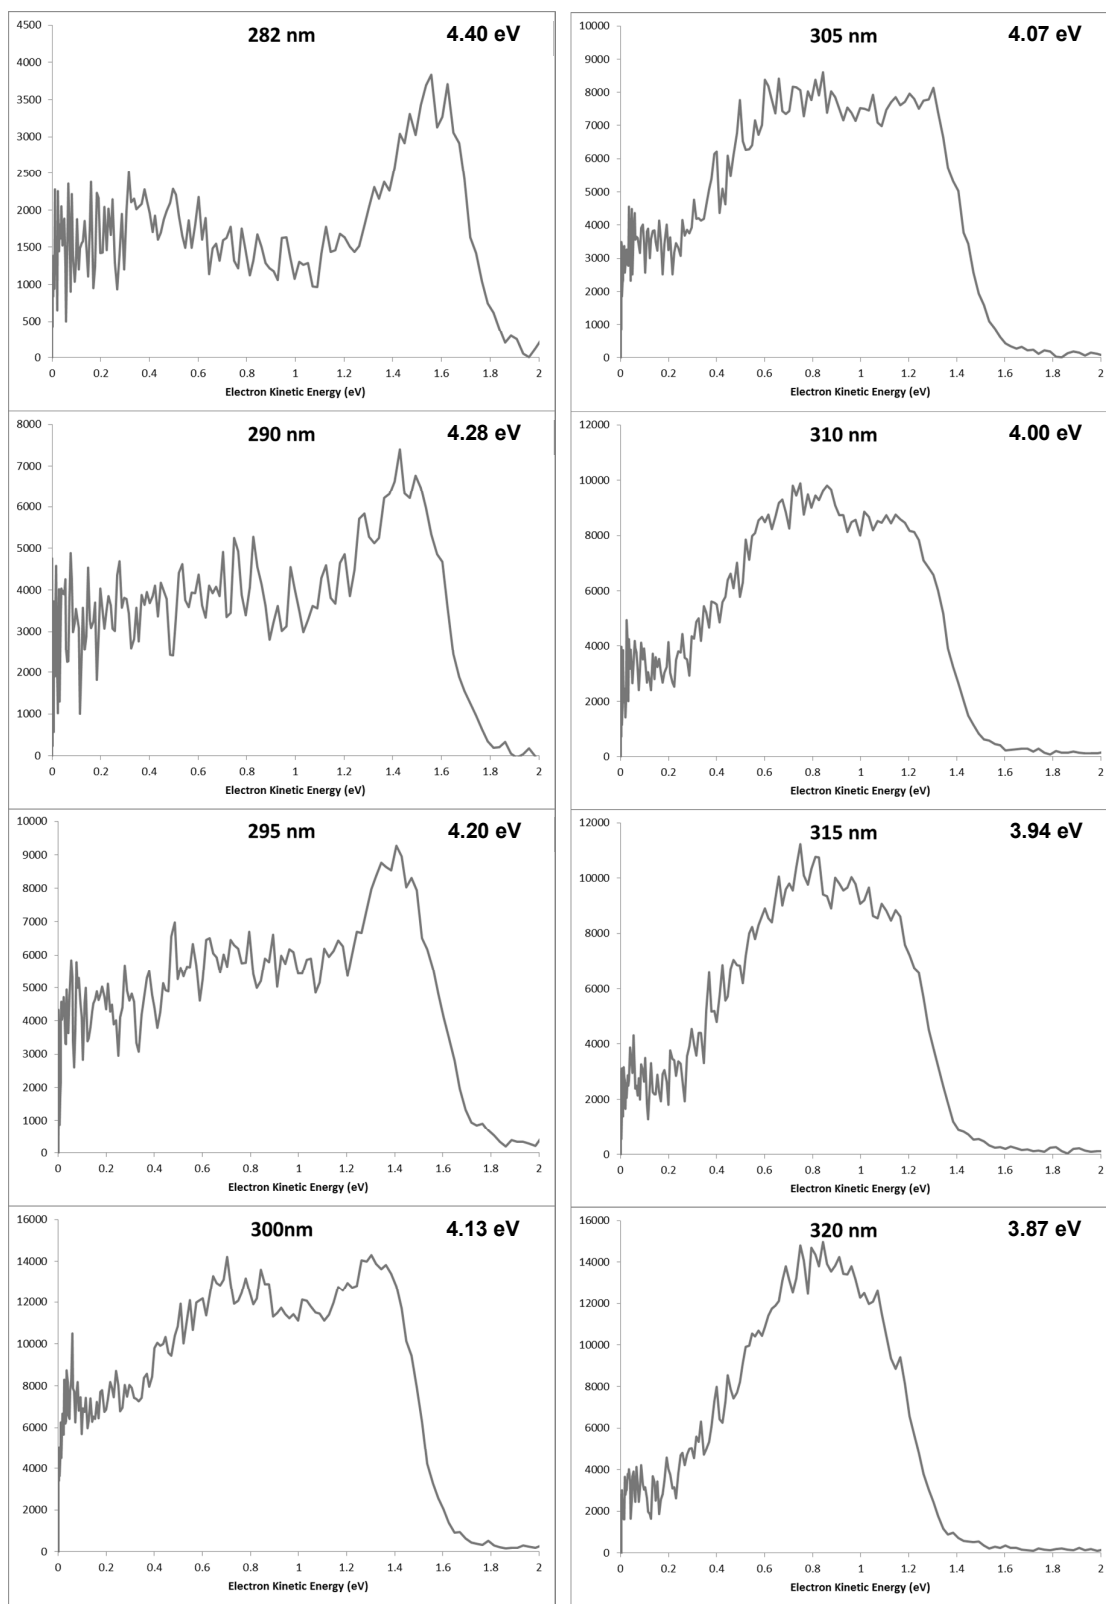

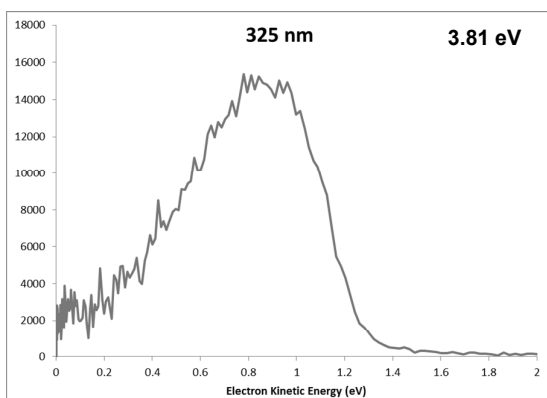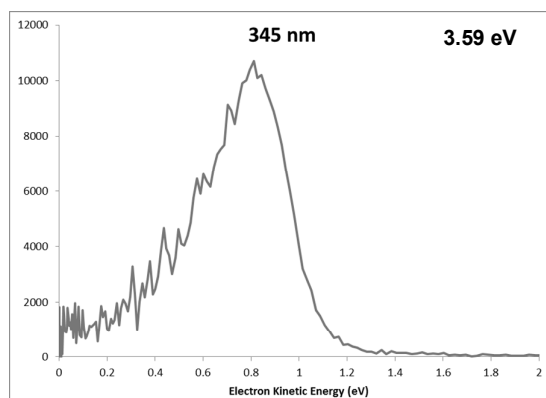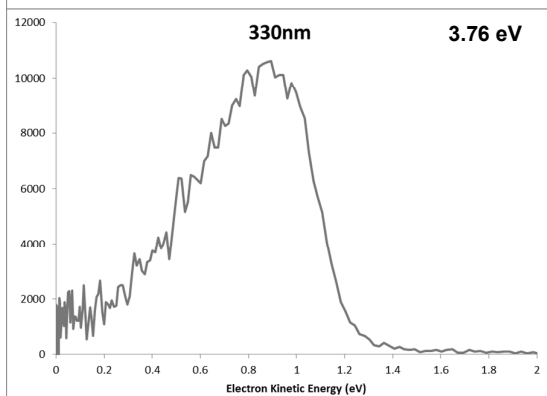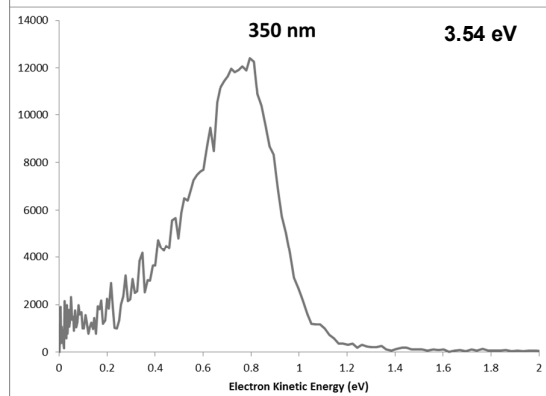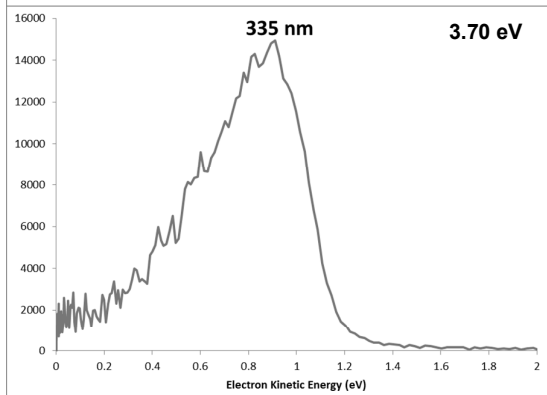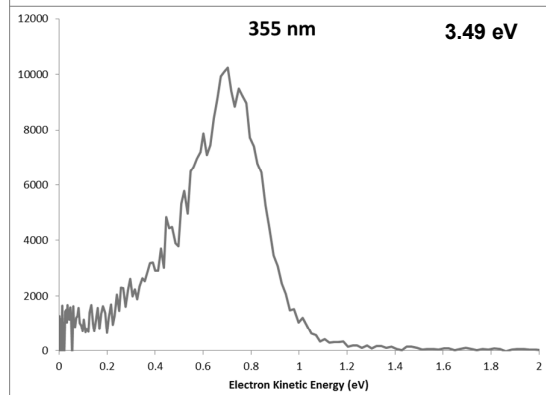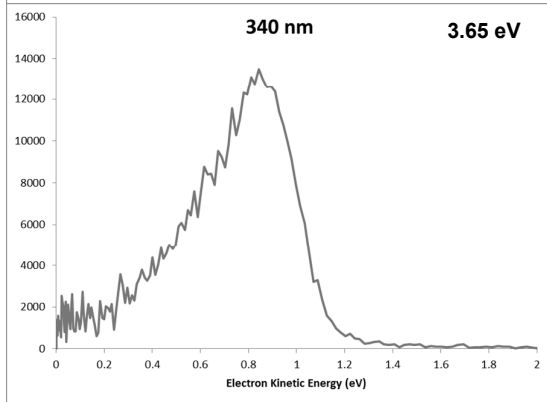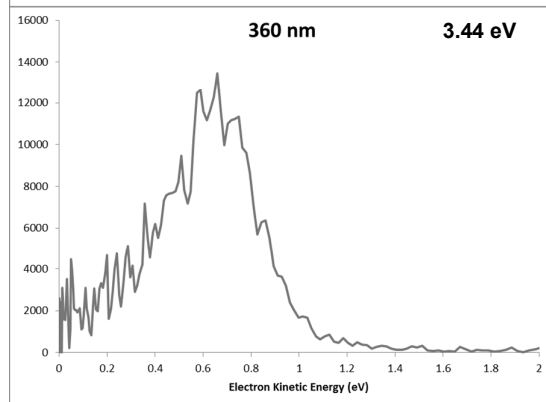

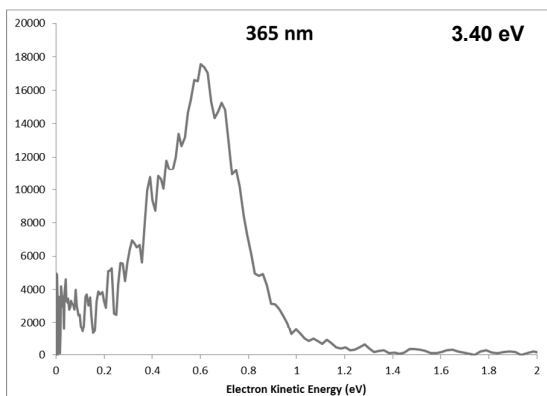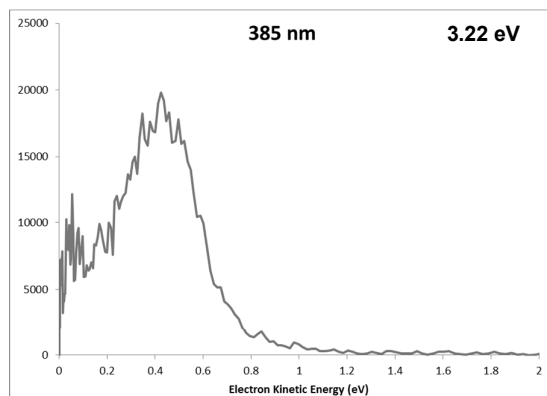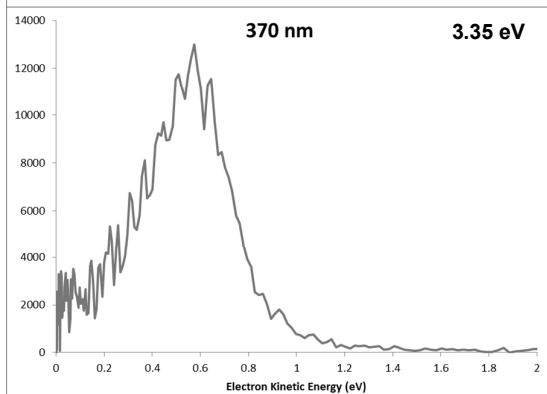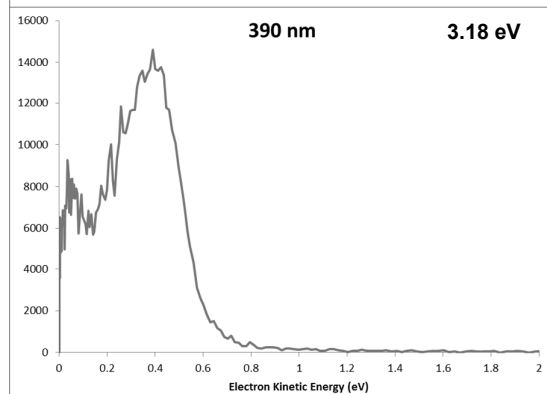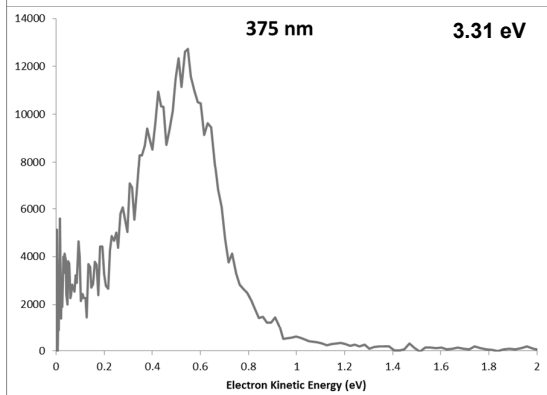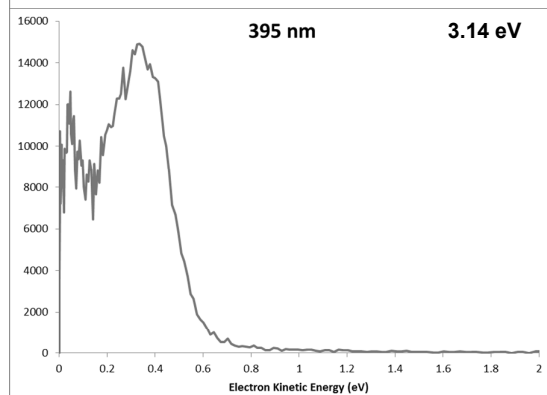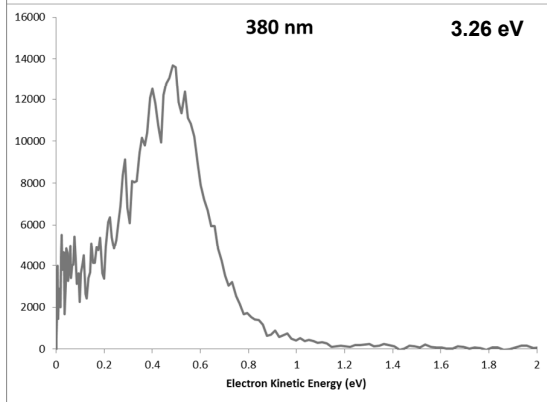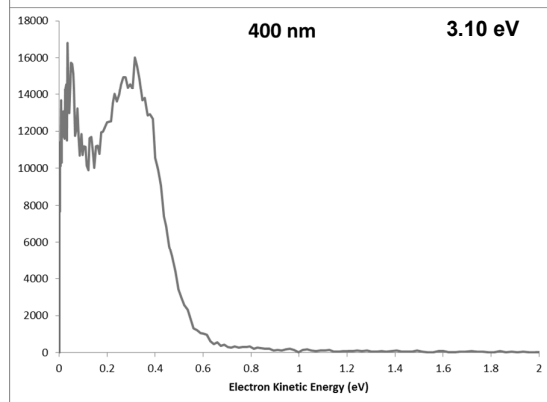

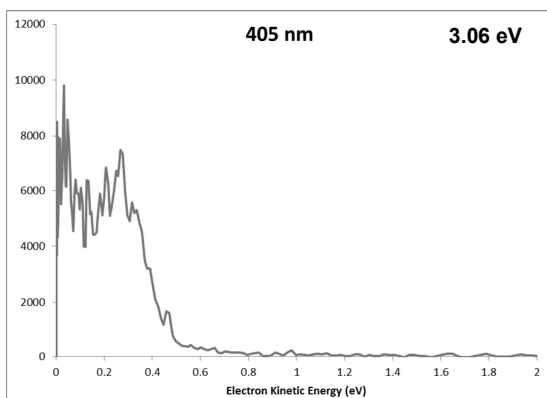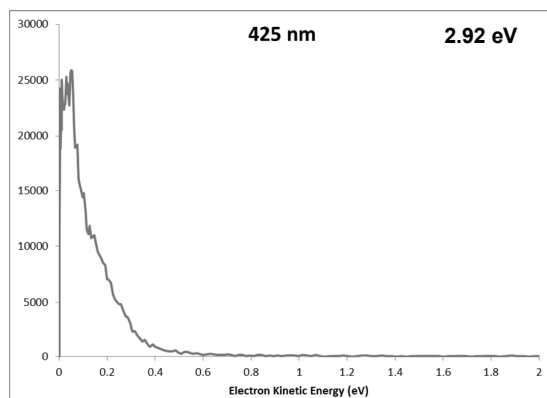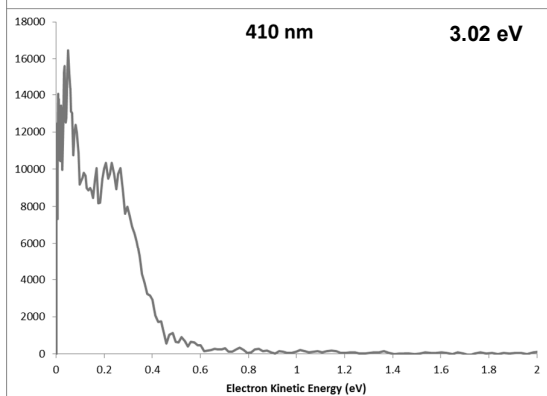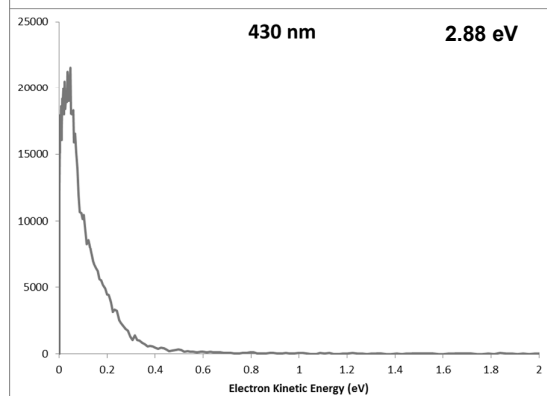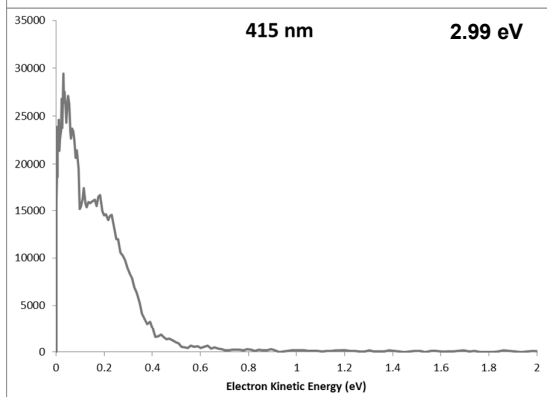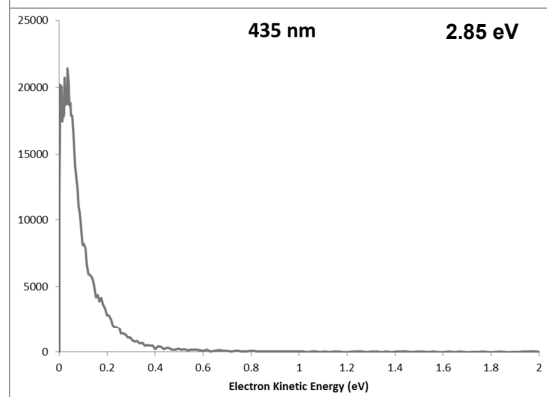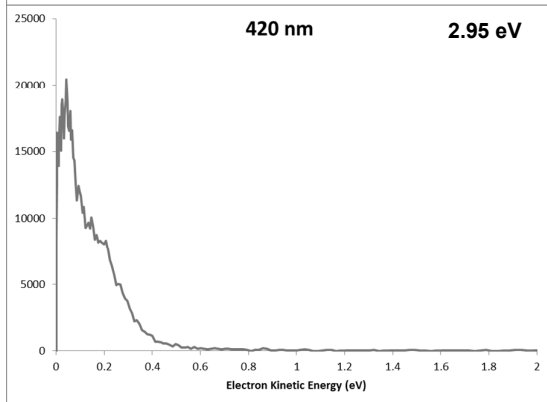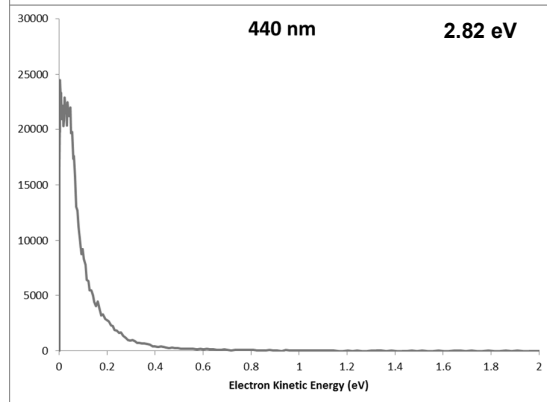

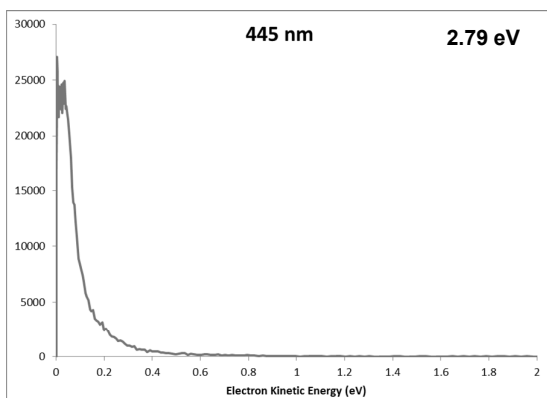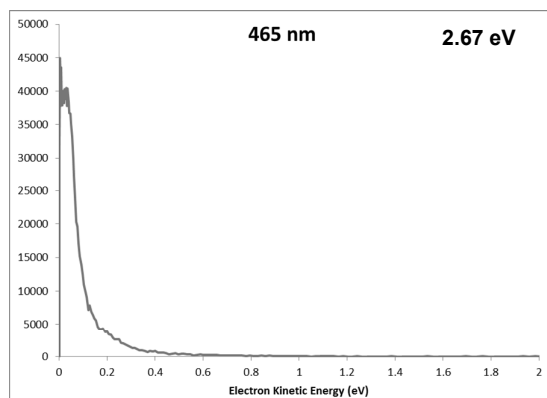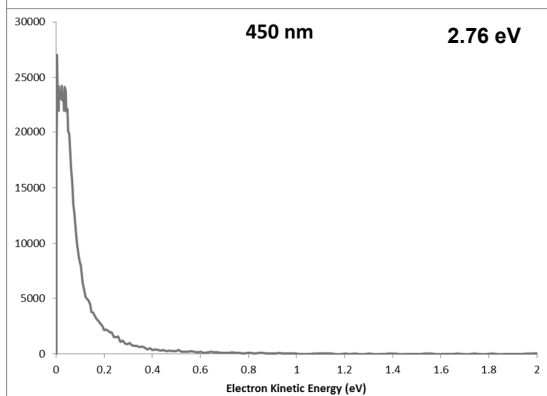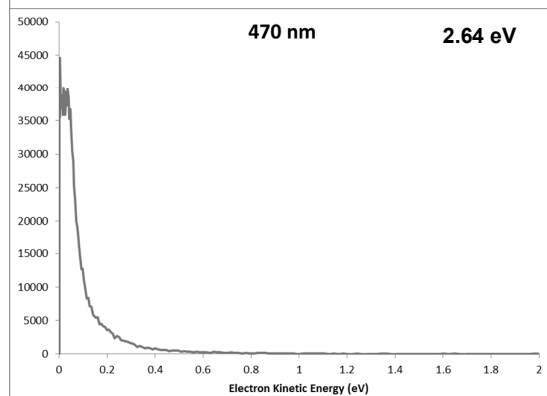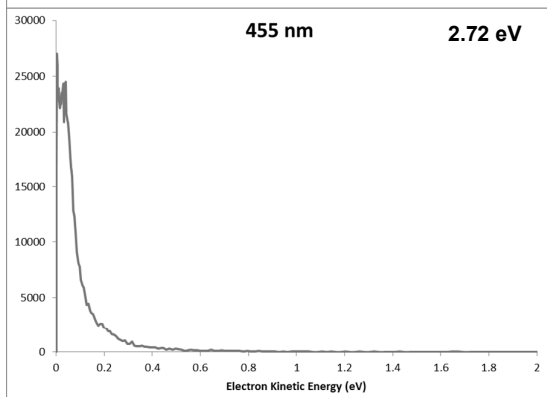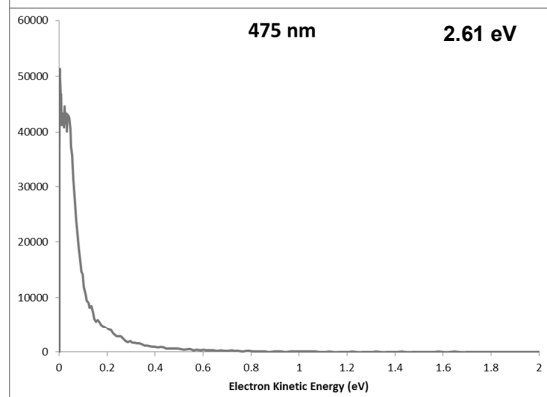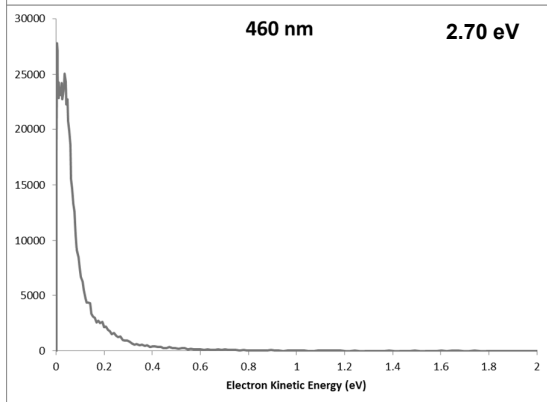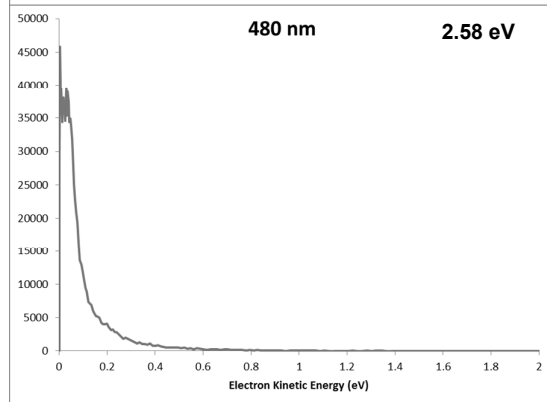

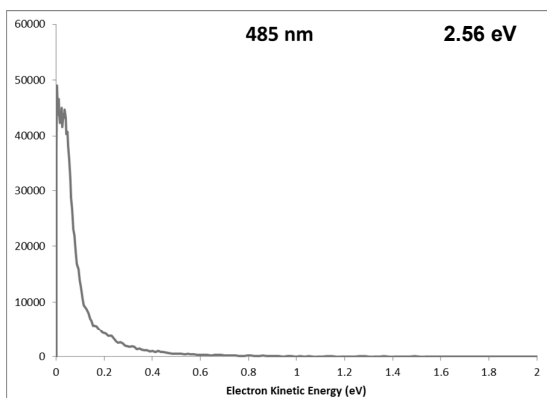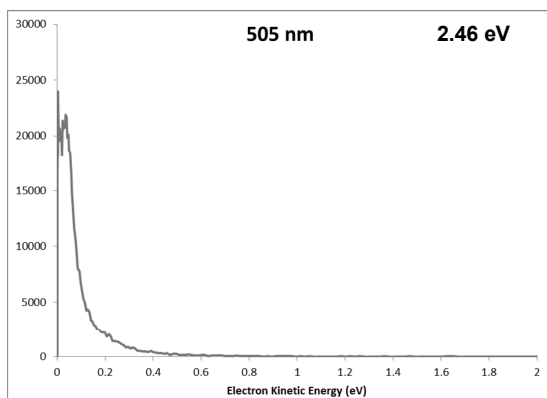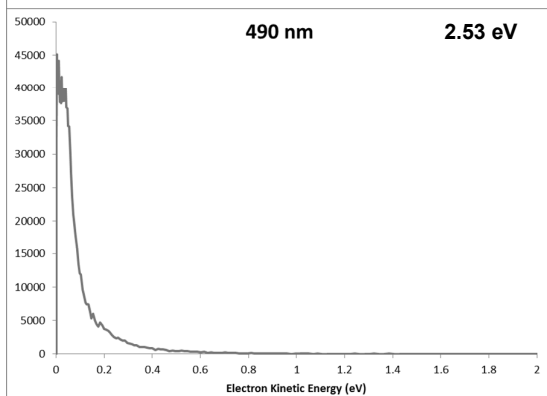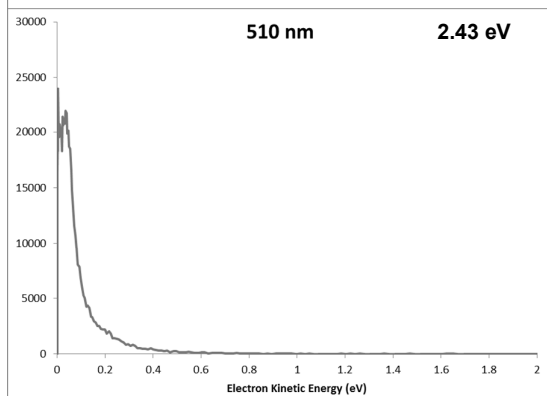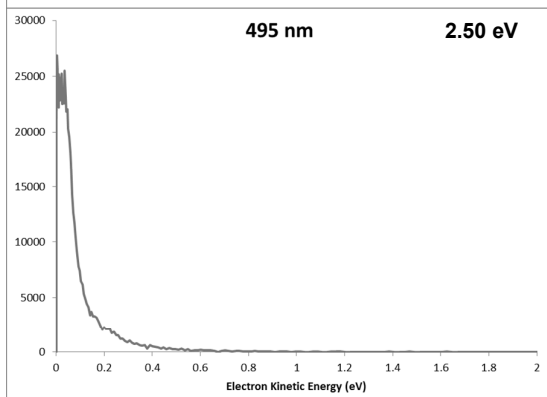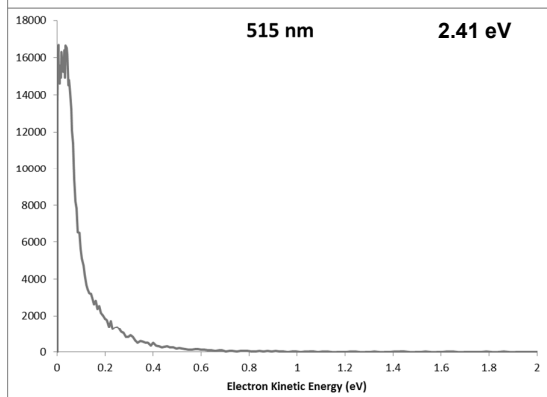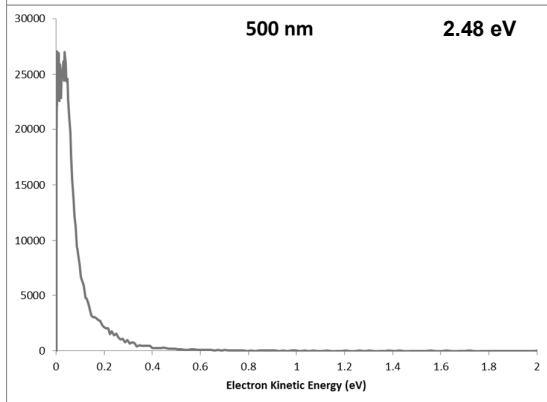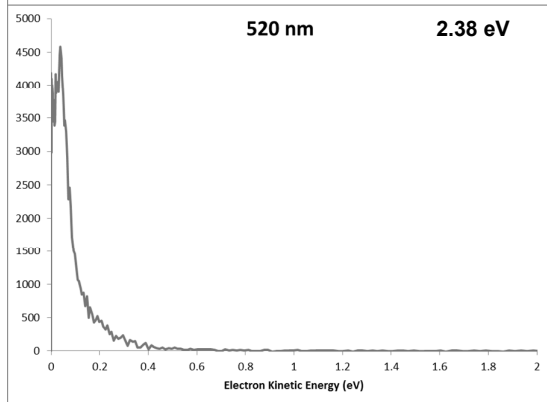

Supplement: Supplementary file 1 [file 3821179]
